# Supplementary material
Source: PubMed Central journal article supplement (PMC1764930)
Supplement: rstb20061922s01.pdf [file rstb20061922s01.pdf]

APPENDIX. Table of polymorphisms of European strains at six loci. Position numbers with reference to published sequence for *S. paradoxus* (CBS432T) in Genbank, numbers starting at first coding nucleotide; for noncoding regions, numbers start at beginning of noncoding region, and negative numbers indicate upstream regions. Coding regions denoted by C and shading; nonsynonymous substitutions by N and bold. R indicates the repeat region in MFalpha1 and RN gives the number of repeats. Consensus nucleotides are shown for European, Far Eastern and Canadian/Brazilian strains and for *S. cerevisiae* Type strain. Only one heterozygous site was found, in the SAG1 fragment of strain T18.2. Identical genotypes within geographic regions have been merged using MacClade's option of considering taxa redundant even if states are not identical, as along as a resolution of missing data could make them identical. This table incorporates data from Johnson *et al.* (2004).

|                              |                                   |                     | SAG1      | AGA2    | STE2          | STE3              | MFA1          | MFalpha1    |               |    |
|------------------------------|-----------------------------------|---------------------|-----------|---------|---------------|-------------------|---------------|-------------|---------------|----|
|                              |                                   |                     | 1         |         | 1 1           |                   |               |             |               |    |
|                              |                                   |                     | 8 9 9 9 4 |         | 8 1 2         | - - 7 8 8 9 2 2 3 | 1 1 2 2 2 2   | 1 2 3 1 1   | 3 3 3 3 4 1   |    |
| Position                     |                                   |                     | 2 2 7 7 8 | 8 3 7 7 | 3 0 3 8 9 1 1 | 9 0 5 7 1 9 6     | 6 0 9 2 3 8 9 | 1 3 4 4 3 0 | 1 2 3 5 5 1   |    |
| Coding (C)/Noncoding         |                                   |                     | 5 0 6 7 5 | 2 3 8 9 | 7 6 3 7 2 3 0 | 2 5 8 7 8 7 5     | 0 9 3 1 1 9 8 | 8 4 9 4 0 8 | 8 4 1 3 4 5 7 |    |
| Nonsynonymous (N)/Synonymous |                                   |                     | C C C C C | C       | C C C         | C C C C C C       | C             | C           | C C C C       |    |
|                              |                                   |                     | N N N     | N       | N             | N N N             |               |             | N N N         |    |
| Location                     |                                   |                     |           |         |               |                   |               | R           | R R R R       | RN |
| Strain ID                    |                                   |                     |           |         |               |                   |               |             |               |    |
| Clone ID                     |                                   |                     |           |         |               |                   |               |             |               |    |
| Russia                       | Leningrad                         | YPS3                | A C A A G | A A T T | C C C A C     | T G G C C C       | C A G G       | C           | T A T - A     | 2  |
|                              | Moscow                            | YPS4                | .         | .       | T . A . .     | .                 | T . . . .     | .           | . . . G .     | 3  |
|                              |                                   | YPS8                | .         | .       | .             | .                 | T . . . .     | .           | . . . G .     | 3  |
|                              |                                   | ATCC96975           | .         | G -     | .             | .                 | T . . . .     | .           | . . . G G     | 3  |
|                              |                                   | ATCC96983           | .         | .       | .             | .                 | T . . A .     | .           | . . . G .     | 3  |
|                              |                                   | ATCC96986           | G G       | G -     | .             | .                 | T . . . .     | .           | . . . G .     | 3  |
| Latvia                       | Sigulda                           | SIG1+SIG8           | .         | G -     | .             | .                 | T . . . .     | .           | . . . G .     | 3  |
|                              |                                   | SIG3                | .         | .       | T . A . .     | .                 | .             | .           | . . . G .     | 3  |
|                              |                                   | SIG6                | T . . . . | .       | .             | .                 | .             | .           | . . . . .     | .  |
|                              | Riga                              | RIG3                | .         | .       | .             | .                 | T . . . .     | .           | . . . . .     | .  |
|                              |                                   | RIG10               | .         | .       | T . . . .     | .                 | T . . . .     | .           | . . . G .     | 3  |
|                              |                                   | RIG11               | .         | .       | .             | .                 | T . . . .     | .           | . . . G .     | 3  |
| Sweden                       | Stockholm                         | STOC3               | .         | .       | .             | .                 | T . . . .     | T           | C G . . .     | .  |
| Unknown                      |                                   | CBS432T             | .         | G G -   | .             | G A . . . . T G   | C T A G A T - | A . . . .   | . . . . .     | C  |
| Denmark                      |                                   | CBS5829             | .         | .       | T T T G       | .                 | A T . . . . . | T . . . .   | . . . G .     | 3  |
| Spain                        | J. Santa Maria                    | CECT10176           | .         | G -     | T . . . .     | .                 | .             | .           | . . . A .     | 3  |
|                              |                                   | CECT10308+CECT10329 | .         | G -     | T . A . .     | T . . . .         | .             | .           | . . . A .     | 3  |
| U.K.                         | Silwood Park & Windsor Great Park | T62.1               | .         | G -     | .             | T . C . . . .     | A T A C C T A | T . . . .   | . . . G .     | 3  |
|                              |                                   | T76.6+Q31.4         | .         | .       | T . . . .     | T . . . .         | T . . . . A   | T . . . .   | . . . G .     | 3  |
|                              |                                   | Q4.1                | .         | .       | T . . . .     | T . . . .         | T . . . .     | T . . . .   | . . . A .     | 3  |
|                              |                                   | Q32.3               | A . . . . | G -     | T . . . .     | T . . . .         | T . . . .     | T . . . .   | . . . G .     | 3  |
|                              |                                   | Q59.1               | .         | G -     | T T T . .     | .                 | T . . . .     | T . . . .   | . . . G .     | 3  |
|                              |                                   | Q70.8+T68.2         | .         | G -     | T . . . .     | T . . . .         | T . . . .     | T . . . .   | . . . A .     | 3  |
|                              |                                   | Y1+(3Ys)            | .         | G -     | T . . . .     | .                 | T . . . .     | T . . . .   | . . . A .     | 3  |
|                              |                                   | Y2+Y10              | .         | G -     | T . . . .     | .                 | T . . . .     | T . . . .   | . . . A .     | 3  |
|                              |                                   | Y2.2+(3Ys)          | .         | G -     | .             | T . . . .         | T . . . .     | T . . . .   | . . . A .     | 3  |
|                              |                                   | Y4+(4Ys+6Zs+6Ts)    | G . . . A | G -     | .             | .                 | .             | T . . . .   | . . . G .     | 3  |
|                              |                                   | Y4.5                | G . . . A | .       | T T . . . .   | .                 | .             | T . . . .   | . . . A .     | 3  |
|                              |                                   | Y5+Y7.1             | .         | .       | T T T . . . . | .                 | T - T . . . . | .           | . . . A .     | 3  |
|                              |                                   | Y6                  | G . . . A | .       | T T . . . .   | .                 | .             | T . . . .   | . . . A .     | 5  |
|                              |                                   | Y6.5+(1Y+2Zs)       | .         | G -     | .             | .                 | .             | T . . . .   | . . . A .     | 3  |
|                              |                                   | Y7                  | G . . . A | G -     | T T . . . .   | .                 | .             | T . . . .   | . . . A .     | 3  |
|                              |                                   | Y8.1                | .         | G .     | T T . . . .   | .                 | .             | T . . . .   | . . . G .     | 3  |
|                              |                                   | Y8.6+(3Ys)          | .         | .       | T T . . . .   | .                 | .             | T . . . .   | . . . A .     | 3  |
|                              |                                   | Z1+(19Zs)+Q95.3     | .         | G -     | .             | .                 | .             | T . . . .   | . . . G .     | 3  |
|                              |                                   | Z1.1                | G . . . A | .       | T T . . . .   | .                 | .             | T . . . .   | . . . . .     | 1  |
